# Supplementary material for: Valproic Acid Confers Functional Pluripotency to Human Amniotic Fluid Stem Cells in a Transgene-free Approach
Source: PubMed Central journal article supplement — Mol Ther. 2012 Jul 3;20(10):1953–67. doi: 10.1038/mt.2012.117 (PMC3464631; doi:10.1038/mt.2012.117), 2012-07-03
Supplement: mt2012117x6.pdf [file mt2012117x6.pdf]

**Table S1****Tissue expression data for the 740 AFSC-specific genes**

| <b>Category</b> | <b>Term</b>                | <b>Count</b> | <b>%</b> | <b>PValue</b> |
|-----------------|----------------------------|--------------|----------|---------------|
| UP_TISSUE       | Liver                      | 119          | 16.1     | 5.10E-06      |
| UP_TISSUE       | Spleen                     | 60           | 8.1      | 9.56E-06      |
| UP_TISSUE       | Lung                       | 137          | 18.6     | 4.28E-05      |
| UP_TISSUE       | Placenta                   | 165          | 22.4     | 2.38E-04      |
| UP_TISSUE       | Leukocyte                  | 16           | 2.2      | 4.68E-04      |
| UP_TISSUE       | Lung fibroblast            | 7            | 0.9      | 0.0054        |
| UP_TISSUE       | Donated clones             | 6            | 0.8      | 0.0065        |
| UP_TISSUE       | Human lung                 | 7            | 0.9      | 0.0076        |
| UP_TISSUE       | Fibroblast                 | 12           | 1.6      | 0.0108        |
| UP_TISSUE       | Platelet                   | 33           | 4.5      | 0.0135        |
| UP_TISSUE       | Brain                      | 333          | 45.1     | 0.0150        |
| UP_TISSUE       | Macrophage                 | 5            | 0.7      | 0.0196        |
| UP_TISSUE       | Endometrial adenocarcinoma | 5            | 0.7      | 0.0222        |
| UP_TISSUE       | Chondrocyte                | 4            | 0.5      | 0.0226        |
| UP_TISSUE       | Prostate                   | 33           | 4.5      | 0.0245        |
| UP_TISSUE       | Embryo                     | 22           | 3.0      | 0.0254        |
| UP_TISSUE       | Hepatoblastoma             | 4            | 0.5      | 0.0358        |
| UP_TISSUE       | Fetal kidney               | 13           | 1.8      | 0.0494        |

**Tissue expression data for the 7905 genes overlapping in AFSCs and hESC**

| <b>Category</b> | <b>Term</b>          | <b>Count</b> | <b>%</b> | <b>PValue</b> |
|-----------------|----------------------|--------------|----------|---------------|
| UP_TISSUE       | Epithelium           | 1629         | 20.8     | 6.31E-124     |
| UP_TISSUE       | Uterus               | 1077         | 13.7     | 7.17E-81      |
| UP_TISSUE       | Skin                 | 1117         | 14.2     | 8.05E-79      |
| UP_TISSUE       | Placenta             | 1831         | 23.4     | 4.30E-71      |
| UP_TISSUE       | Muscle               | 545          | 7.0      | 3.93E-52      |
| UP_TISSUE       | Lung                 | 1406         | 17.9     | 2.39E-50      |
| UP_TISSUE       | Eye                  | 636          | 8.1      | 1.19E-43      |
| UP_TISSUE       | Brain                | 3667         | 46.8     | 1.78E-34      |
| UP_TISSUE       | Cervix carcinoma     | 265          | 3.4      | 2.69E-33      |
| UP_TISSUE       | Umbilical cord blood | 235          | 3.0      | 2.50E-32      |
| UP_TISSUE       | Cervix               | 329          | 4.2      | 4.06E-30      |
| UP_TISSUE       | Fetal brain cortex   | 166          | 2.1      | 1.08E-27      |
| UP_TISSUE       | Cajal-Retzius cell   | 154          | 2.0      | 1.90E-27      |
| UP_TISSUE       | Ovary                | 489          | 6.2      | 2.47E-26      |
| UP_TISSUE       | Platelet             | 345          | 4.4      | 1.06E-24      |
| UP_TISSUE       | Bone marrow          | 430          | 5.5      | 5.07E-23      |
| UP_TISSUE       | Kidney               | 771          | 9.8      | 4.83E-19      |
| UP_TISSUE       | Lymph                | 385          | 4.9      | 8.45E-19      |

|           |                                       |      |      |          |
|-----------|---------------------------------------|------|------|----------|
| UP_TISSUE | Melanoma                              | 202  | 2.6  | 2.50E-16 |
| UP_TISSUE | Liver                                 | 1023 | 13.1 | 4.96E-16 |
| UP_TISSUE | Pancreas                              | 522  | 6.7  | 3.20E-15 |
| UP_TISSUE | Teratocarcinoma                       | 311  | 4.0  | 3.06E-14 |
| UP_TISSUE | B-cell lymphoma                       | 95   | 1.2  | 3.66E-14 |
| UP_TISSUE | Colon                                 | 602  | 7.7  | 3.30E-13 |
| UP_TISSUE | Duodenum                              | 106  | 1.4  | 2.02E-11 |
| UP_TISSUE | Colon carcinoma                       | 119  | 1.5  | 4.07E-11 |
| UP_TISSUE | Coronary artery                       | 52   | 0.7  | 8.02E-11 |
| UP_TISSUE | Urinary bladder                       | 126  | 1.6  | 8.06E-10 |
| UP_TISSUE | Ovarian carcinoma                     | 100  | 1.3  | 1.23E-09 |
| UP_TISSUE | Embryo                                | 195  | 2.5  | 7.84E-09 |
| UP_TISSUE | Hepatoma                              | 139  | 1.8  | 1.02E-08 |
| UP_TISSUE | Fibroblast                            | 86   | 1.1  | 1.06E-08 |
| UP_TISSUE | T-cell                                | 183  | 2.3  | 1.18E-08 |
| UP_TISSUE | Aorta endothelial cell                | 60   | 0.8  | 1.63E-08 |
| UP_TISSUE | Renal cell carcinoma                  | 46   | 0.6  | 4.49E-07 |
| UP_TISSUE | Adipose tissue                        | 105  | 1.3  | 4.61E-07 |
| UP_TISSUE | Embryonic kidney                      | 53   | 0.7  | 7.48E-07 |
| UP_TISSUE | Mammary carcinoma                     | 65   | 0.8  | 8.39E-07 |
| UP_TISSUE | Aorta                                 | 79   | 1.0  | 3.02E-06 |
| UP_TISSUE | Lung carcinoma                        | 57   | 0.7  | 4.02E-06 |
| UP_TISSUE | Fetal brain                           | 384  | 4.9  | 4.99E-06 |
| UP_TISSUE | Mammary gland                         | 208  | 2.7  | 1.46E-05 |
| UP_TISSUE | Adrenal gland                         | 106  | 1.4  | 1.71E-05 |
| UP_TISSUE | Hypothalamus                          | 75   | 1.0  | 3.38E-05 |
| UP_TISSUE | Pituitary                             | 84   | 1.1  | 7.21E-05 |
| UP_TISSUE | Colon adenocarcinoma                  | 50   | 0.6  | 2.47E-04 |
| UP_TISSUE | Uterine endothelium                   | 24   | 0.3  | 2.74E-04 |
| UP_TISSUE | Leukemia                              | 42   | 0.5  | 4.69E-04 |
| UP_TISSUE | B-cell                                | 139  | 1.8  | 6.31E-04 |
| UP_TISSUE | Bladder                               | 46   | 0.6  | 8.07E-04 |
| UP_TISSUE | Pituitary tumor                       | 19   | 0.2  | 0.0011   |
| UP_TISSUE | Endometrial tumor                     | 29   | 0.4  | 0.0018   |
| UP_TISSUE | Human small intestine                 | 44   | 0.6  | 0.0025   |
| UP_TISSUE | Hair follicle dermal papilla          | 20   | 0.3  | 0.0026   |
| UP_TISSUE | Hematopoietic stem cell               | 22   | 0.3  | 0.0033   |
| UP_TISSUE | Fetal kidney                          | 95   | 1.2  | 0.0033   |
| UP_TISSUE | Promyelocytic leukemia                | 23   | 0.3  | 0.0036   |
| UP_TISSUE | Bone                                  | 38   | 0.5  | 0.0036   |
| UP_TISSUE | Neuroblastoma                         | 89   | 1.1  | 0.0039   |
| UP_TISSUE | Human endometrium carcinoma cell line | 14   | 0.2  | 0.0042   |
| UP_TISSUE | Osteosarcoma                          | 27   | 0.3  | 0.0045   |
| UP_TISSUE | Hepatocyte                            | 27   | 0.3  | 0.0045   |
| UP_TISSUE | Mammary cancer                        | 52   | 0.7  | 0.0046   |

|           |                                            |     |     |        |
|-----------|--------------------------------------------|-----|-----|--------|
| UP_TISSUE | Endometrium carcinoma cell line            | 17  | 0.2 | 0.0069 |
| UP_TISSUE | Prostate                                   | 267 | 3.4 | 0.0105 |
| UP_TISSUE | Adipocyte                                  | 18  | 0.2 | 0.0135 |
| UP_TISSUE | Amygdala                                   | 281 | 3.6 | 0.0157 |
| UP_TISSUE | Lung fibroblast                            | 26  | 0.3 | 0.0162 |
| UP_TISSUE | Human uterus endothel primary cell culture | 9   | 0.1 | 0.0170 |
| UP_TISSUE | T cells                                    | 9   | 0.1 | 0.0170 |
| UP_TISSUE | Retinoblastoma                             | 40  | 0.5 | 0.0184 |
| UP_TISSUE | Whole embryo                               | 58  | 0.7 | 0.0184 |
| UP_TISSUE | Glioblastoma                               | 15  | 0.2 | 0.0195 |
| UP_TISSUE | Erythrocyte                                | 17  | 0.2 | 0.0216 |
| UP_TISSUE | Dendritic cell                             | 43  | 0.5 | 0.0223 |
| UP_TISSUE | Lung adenocarcinoma                        | 18  | 0.2 | 0.0224 |
| UP_TISSUE | Glial tumor                                | 20  | 0.3 | 0.0233 |
| UP_TISSUE | Colon mucosa                               | 36  | 0.5 | 0.0267 |
| UP_TISSUE | Chondrosarcoma                             | 26  | 0.3 | 0.0330 |
| UP_TISSUE | Human colon endothel primary cell culture  | 8   | 0.1 | 0.0331 |
| UP_TISSUE | Choriocarcinoma                            | 18  | 0.2 | 0.0350 |
| UP_TISSUE | Pheochromocytoma                           | 20  | 0.3 | 0.0352 |
| UP_TISSUE | Salivary gland                             | 56  | 0.7 | 0.0366 |
| UP_TISSUE | Endothelial cell                           | 33  | 0.4 | 0.0379 |
| UP_TISSUE | Liver cancer                               | 10  | 0.1 | 0.0441 |
| UP_TISSUE | Colon endothelium                          | 24  | 0.3 | 0.0473 |
| UP_TISSUE | Gastric adenocarcinoma                     | 11  | 0.1 | 0.0474 |
| UP_TISSUE | Myeloid leukemia cell                      | 11  | 0.1 | 0.0474 |
| UP_TISSUE | Endometrium                                | 47  | 0.6 | 0.0492 |

#### Tissue expression data for the 1748 hESC-specific genes

| Category  | Term            | Count | %    | PValue   |
|-----------|-----------------|-------|------|----------|
| UP_TISSUE | Brain           | 779   | 44.7 | 1.03E-04 |
| UP_TISSUE | Myometrium      | 6     | 0.3  | 5.63E-04 |
| UP_TISSUE | Small intestine | 49    | 2.8  | 5.96E-04 |
| UP_TISSUE | Temporal cortex | 4     | 0.2  | 0.0121   |
| UP_TISSUE | Heart muscle    | 6     | 0.3  | 0.0298   |
| UP_TISSUE | Insulinoma      | 7     | 0.4  | 0.0366   |
| UP_TISSUE | Teratocarcinoma | 62    | 3.6  | 0.0366   |
| UP_TISSUE | Amygdala        | 69    | 4.0  | 0.0376   |
