# Supplementary material for: Valproic Acid Confers Functional Pluripotency to Human Amniotic Fluid Stem Cells in a Transgene-free Approach
Source: PubMed Central journal article supplement — Mol Ther. 2012 Jul 3;20(10):1953–67. doi: 10.1038/mt.2012.117 (PMC3464631; doi:10.1038/mt.2012.117), 2012-07-03
Supplement: mt2012117x7.pdf [file mt2012117x7.pdf]

**Table S2**

List of primers used for RT-PCR and quantitative real time RT-PCR.

| Gene   | Forward                      | Reverse                         | Accession no. |
|--------|------------------------------|---------------------------------|---------------|
| SRY    | 5'-TGGCGATTAAGTCAAATTCGC-3'  | 5'-CCCCCTAGTACCCTGACAATGTATT-3' | NM_003140.1   |
| OCT4   | 5'-TCGAGAACCGAGTGAGAGGC-3'   | 5'-CACACTCGGACCACATCCTTC-3'     | NM_203289     |
| NANOG  | 5'-CCAACATCCTGAACCTCAGCTAC3' | 5'-GCCTTCTGCGTCACACCATT-3'      | NM_024865.2   |
| NESTIN | 5'-TCCAGGAACGGAAAATCAAG-3'   | 5'-GCCTCCTCATCCCCTACTTC-3'      | NM_006617.1   |
| PAX6   | 5'-AGATTCAGATGAGGCTCAAA-3'   | 5'-AATTGGTTGGTAGACACTGG-3'      | NM_000280.3   |
| BMP4   | 5'-GTGAGGAGCTTCCACCACGA-3'   | 5'-ACTGGTCCCTGGGATGTTCTC-3'     | NM_130850.2   |
| CK3    | 5'-CGTACAGCTGCTGAGAATGA-3'   | 5'-CTGAGCGATATCCTCATACT-3'      | NM_057088.2   |
| CK19   | 5'-GGCCACACGGAGCAGCTCCA-3'   | 5'-CGCCTGGATATGCGCCAGCT-3'      | NM_002276.4   |
| GATA6  | 5'-ACCACCTTATGGCGCAGAAAC-3'  | 5'-TTTTTCATAGCAAGTGGTCTGGG-3'   | NM_005257.3   |
| SYCP1  | 5'-ACAGCGAAAAGCCATTCAGGA-3'  | 5'-GCCTGGTTTCTTCCCGTTCATA-3'    | NM_003176.2   |
| SOX2   | 5'-CACACTGCCCTCTCACACAT-3'   | 5'-CATTTCCTCGTTTTTCTTTGAA-3'    | NM_003106.2   |
| KLF4   | 5'-CACATTAATGAGGCAGCCACC-3'  | 5'-AAGTCGCTTCATGTGGGAGAG-3'     | NM_004235.4   |

|       |                                |                                |             |
|-------|--------------------------------|--------------------------------|-------------|
| C-MYC | 5'-TTGTACCTGCAGGATCTGAG-3'     | 5'-CTTGTCCTCCTCAGAGTCG-3'      | NM_002467.3 |
| REX1  | 5'-GCGTACGCAAATTAAGTCCAGA-3'   | 5'-CAGCATCCTAAACAGCTCGCAGAA3'  | NM_174900.3 |
| HTERT | 5'-CGGAAGAGTGTCTGGAGCAAGT-3'   | 5'-GAACAGTGCCTTCACCCTCGA-3'    | NM_198253.2 |
| 28S   | 5'-TCTGCTCCTCCTGTTGACA-3'      | 5'-AAAAGCAGCCCTGGTGACC-3'      | NM_002046.3 |
| SOX17 | 5'-GGCGCAGCAGAATCCAGA-3'       | 5'-CCACGACTTGCCCAGCAT-3'       | NM_022454   |
| ERAS  | 5'-ATGGAGCTGCCAACAAGCCTGGCA-3' | 5'-TTCAGGCCACAGAGCAGCCACAGT-3' | NM_181532   |
| T     | 5'-TGCTTCCCTGAGACCCAGTT-3'     | 5'GATCACTTCTTTCTTTGCATCAAG-3'  | NM_003181   |
| FGF8  | 5'-TGAGCTGCCTGCTGUGCACU-3'     | 5'-TGAAGACGCAGTCC1TGCC1T-3'    | NM_033163   |
| OPN   | 5'-GCCGACCAAGGAAAACACTACTA-3'  | 5'-CAGAACTTCCAGAATCAGCCTGTT-3' | NM_000582   |
| PPARG | 5'-CACAAGAACAGATCCAGTGGTTC-3'  | 5'-GAGGCTTATTGTAGAGCTGAGTTC-3' | NM_138712   |
| COL1  | 5'-AAGGTCATGCTGGTCTTGCT-3'     | 5'-GACCCTGTTACCTTTTCCA-3'      | NM_000088   |
| SOX17 | 5'-GGCGCAGCAGAATCCAGA-3'       | 5'-CCACGACTTGCCCAGCAT-3'       | NM_022454   |
| SOX7  | 5'-ACGCCGAGCTCAGCAAGAT-3'      | 5'-TCCACGTACGGCCTCTTCTG-3'     | NM_031439   |
| HNF2B | 5'-GGGAGCGGTGAAGATGGA-3'       | 5'-TCATGTTGCTCACGGAGGAGTA-3'   | NM_153675   |
| GSC   | 5'-GAGGAGAAAGTGGAGGTCTGGT-3'   | 5'-CTCTGATGAGGACCGCTTCTG-3'    | NM_173849   |
