# Supplementary material for: Valproic Acid Confers Functional Pluripotency to Human Amniotic Fluid Stem Cells in a Transgene-free Approach
Source: PubMed Central journal article supplement — Mol Ther. 2012 Jul 3;20(10):1953–67. doi: 10.1038/mt.2012.117 (PMC3464631; doi:10.1038/mt.2012.117), 2012-07-03
Supplement: mt2012117x8.pdf [file mt2012117x8.pdf]

**Table S3**

List of antibodies used for IF and FC

|            | <b>Host species</b> | <b>Application</b> | <b>Dilution</b> | <b>Supplier</b>                                                                                                      |
|------------|---------------------|--------------------|-----------------|----------------------------------------------------------------------------------------------------------------------|
| AFP        | Mouse               | IF                 | 1:100           | Abcam ( <a href="http://www.abcam.com/">http://www.abcam.com/</a> )                                                  |
| B-TUBULIN  | Mouse               | IF                 | 1:50            | Millipore                                                                                                            |
| CD105      | Mouse               | IF                 | 1:50            | BD Biosciences ( <a href="http://www.bdbiosciences.com/eu/index.jsp">http://www.bdbiosciences.com/eu/index.jsp</a> ) |
| CD105-FITC | Mouse               | FC                 | 1:50            | Abcam                                                                                                                |
| CD14       | Mouse               | IF                 | 1:100           | Dako Cytomation ( <a href="http://www.dako.com/">http://www.dako.com/</a> )                                          |
| CD24-PE    | Mouse               | FC                 | 1:50            | Abcam                                                                                                                |
| CD29       | Mouse               | IF/FC              | 1:100           | Abcam                                                                                                                |
| CD34       | Mouse               | IF                 | 1:100           | Dako Cytomation                                                                                                      |
| CD44       | Mouse               | IF                 | 1:50            | Abcam                                                                                                                |
| CD45       | Mouse               | IF                 | 1:100           | Dako Cytomation                                                                                                      |
| CD73       | Mouse               | IF                 | 1:50            | BD Biosciences                                                                                                       |
| CD90       | Mouse               | IF/FC              | 1:100           | Abcam                                                                                                                |

|             |        |        |       |                                                                                                                                 |
|-------------|--------|--------|-------|---------------------------------------------------------------------------------------------------------------------------------|
| C-KIT       | Rabbit | IF     | 1:20  | Santa Cruz                                                                                                                      |
| C-KIT-PE    | Mouse  | FC     | 1:10  | R&D Systems ( <a href="http://www.rndsystems.com/">http://www.rndsystems.com/</a> )                                             |
| C-MYC-PE    | Mouse  | IF, FC | 1:20  | R&D Systems                                                                                                                     |
| CXCR4-PE    | Mouse  | FC     | 1:50  | R&D Systems                                                                                                                     |
| FIBRONECTIN | Mouse  | IF     | 1:100 | Dako Cytomation                                                                                                                 |
| GATA4       | Rabbit | IF     | 1:100 | Abcam                                                                                                                           |
| HLAI        | Mouse  | IF     | 1:100 | Dako Cytomation                                                                                                                 |
| HLAII       | Mouse  | IF     | 1:100 | Dako Cytomation                                                                                                                 |
| HNF3B       | Goat   | IF     | 1:50  | R&D Systems                                                                                                                     |
| KLF4        | Mouse  | IF     | 1:2   | Stemgent ( <a href="http://www.stemgent.com/commerce/pages/home">http://www.stemgent.com/commerce/pages/home</a> )              |
| LAMININ     | Rabbit | IF     | 1:100 | Sigma ( <a href="http://www.sigmaaldrich.com/sigma-aldrich/home.html">http://www.sigmaaldrich.com/sigma-aldrich/home.html</a> ) |
| MAP2        | Mouse  | IF     | 1:100 | Abcam                                                                                                                           |
| NANOG       | Rabbit | IF, FC | 1:20  | Abcam                                                                                                                           |
| NANOS 3     | Goat   | IF     | 1:20  | Santa Cruz                                                                                                                      |
| NESTIN      | Mouse  | IF     | 1:50  | Chemicon ( <a href="http://www.millipore.com/company/cpl/redirect-ab">http://www.millipore.com/company/cpl/redirect-ab</a> )    |

|           |        |        |       |                                                                                                             |
|-----------|--------|--------|-------|-------------------------------------------------------------------------------------------------------------|
| NG2       | Mouse  | IF     | 1:50  | Millipore                                                                                                   |
| NMDAR1    | Mouse  | IF     | 1:50  | Abcam                                                                                                       |
| O4        | Mouse  | IF     | 1:50  | Millipore                                                                                                   |
| OCT-4A    | Mouse  | IF     | 1:2   | Santa Cruz                                                                                                  |
| OCT-4A-PE | Mouse  | FC     | 1:10  | R&D Systems                                                                                                 |
| REX1      | Rabbit | IF     | 1:100 | Stemgent                                                                                                    |
| SOX2      | Rabbit | IF     | 1:100 | Abcam                                                                                                       |
| SOX2-PE   | Mouse  | FC     | 1:10  | R&D Systems                                                                                                 |
| SOX17     | Goat   | IF     | 1:50  | R&D Systems                                                                                                 |
| SSEA3     | Rat    | IF     | 1:50  | Abcam                                                                                                       |
| SSEA3     | Mouse  | FC     | 1:5   | Dev. Studies Hybridoma Bank ( <a href="http://dshb.biology.uiowa.edu/">http://dshb.biology.uiowa.edu/</a> ) |
| SSEA4     | Mouse  | IF     | 1:50  | Abcam                                                                                                       |
| SSEA4-PE  | Mouse  | FC     | 1:10  | R&D Systems                                                                                                 |
| TRA-1-60  | Mouse  | IF, FC | 1:10  | Santa Cruz                                                                                                  |
| VIMENTIN  | Mouse  | IF     | 1:100 | Dako Cytomation                                                                                             |
